# Supplementary material for: Complete study demonstrating the absence of rhabdovirus in a distinct Sf9 cell line
Source: PLoS One. 2017 Apr 19;12(4):e0175633. doi: 10.1371/journal.pone.0175633 (PMC5397025; doi:10.1371/journal.pone.0175633)
Supplement: S4 Table — (XLSX) [file pone.0175633.s004.xlsx]

## Sheet: S4 Table
Position of SfRV sequence			Gap in alignment, nt	Hit sequence					E value	Identity, %	BlastN search of non-SfRV sequence in hit sequence (position, blastN hit ID)***
Start	End	Corresponding gene*		Length, nt	Hit, position		+/- Strand**	EST clone ID
					Start	End
1	47	3' UTR	0	398	67	21	+	Sf9LR606677-5-1	1e-16	100	68..398; no significant hit
1	47	3' UTR	0	456	67	21	+	Sf9LR488079-5-1	1e-16	100	68..456; no significant hit
1	112	N	1	745	134	22	+	Sf9LR160572-5-1-C1321	3e-51	99	135..745; Spodoptera frugiperda ribosomal protein S17 mRNA (AF400214)
1	124	N	2	448	302	427	-	Sf9LR501316-5-1	8e-55	97	1..301; Spodoptera frugiperda mitochondrion (KM362176 )
1	126	N	0	520	144	19	+	Sf9LR633827-5-1	2e-61	99	145..520; no significant hit
1	129	N	0	387	148	20	+	Sf9LR572905-5-1	1e-65	100	149..387; no significant hit
1	148	N	0	480	167	20	+	Sf9LR568263-5-1	2e-74	99	168..480; no significant hit
1	1188	N	2	1317	1186	1	+	Sf9LR550001-5-1-C1524	0	99	1187..1317; Spodoptera frugiperda mitochondrion (KM362176 )
1	1722	N	1	1936	1728	8	+	Sf9LR450003-5-1-C1407	0	99	1729..1317; 1..301; Spodoptera frugiperda mitochondrion (KM362176 )
2	1133	N	2	1203	1154	23	+	Sf9LR160572-5-1-C1465	0	99
3	57	3' UTR	0	613	55	1	+	Sf9LR750002-5-1-C624	2e-21	100	56..613; PREDICTED: Plutella xylostella nucleolar GTP-binding protein 2 (LOC105393988), mRNA (XM_011565820)
3	57	3' UTR	0	529	475	529	-	Sf9LR650001-5-1-C1537	2e-21	100	1..474; PREDICTED: Plutella xylostella nucleolar GTP-binding protein 2 (LOC105393988), mRNA (XM_011565820)
3	67	3' UTR	0	434	85	21	+	Sf9LR845122-5-1	2e-27	100	86..434: PREDICTED: Plutella xylostella profilin (LOC105384065), mRNA (XM_011554228)
3	92	N	0	482	378	467	-	Sf9LR176988-5-1	6e-40	98	1..377; 41I04_SfBAC_fin, Spodoptera frugiperda BAC, egg DNA (FP340412)
3	111	N	1	403	128	20	+	Sf9LR777980-5-1	3e-51	99	129..403; Spodoptera frugiperda mitochondrion (KM362176 )
3	129	N	4	434	306	434	-	Sf9LR755494-5-1	4e-47	96	1..305; PREDICTED: Plutella xylostella profilin (LOC105384065), mRNA (XM_011554228)
3	143	N	2	541	164	22	+	Sf9LR619310-5-1	2e-64	98	165..541; Spodoptera frugiperda mitochondrion (KM362176 )
3	182	N	0	442	198	19	+	Sf9LR475916-5-1	5e-96	100	199..442; Pieris rapae actin depolymerization factor mRNA, complete cds (FJ905301)
3	215	N	6	515	219	297	-	Sf9LR344267-5-1	8e-92	96	1..218; 298..515; Spodoptera frugiperda mitochondrion (KM362176 )
3	216	N	6	755	212	1	+	Sf9LR650001-5-1-C557	2e-92	96	213..755; PREDICTED: Amyelois transitella putative uncharacterized protein (XM_013333785)
3	494	N	0	762	245	736	-	Sf9LR350002-5-1-C1387	0	98	1..244; Pieris rapae actin depolymerization factor mRNA, complete cds.(FJ905301)
3	656	N	0	725	59	712	-	Sf9LR750002-5-1-C1457	0	99
6	113	N	0	505	128	21	+	Sf9LR670517-5-1	5e-53	100	129..505; Heliothis virescens selenophosphate synthetase 1 mRNA, complete cds (FJ550361)
6	116	N	0	488	130	20	+	Sf9LR542512-5-1	2e-52	99	131..488; Bombyx mori transformer-2 protein (TRA-2) gene, complete cds, alternatively spliced (AY626066)
11	1722	N	0	1782	12	1723	-	Sf9LR650001-5-1-C431	0	99
14	215	N	1	540	330	530	-	Sf9LR628876-5-1	1e-99	98	1..329; Spodoptera frugiperda mitochondrion (KM362176 )
26	1663	N	0	1618	19	1656	-	Sf9LR250003-5-1-C897	0	99
33	246	N	1	497	497	283	+	Sf9LR655986-5-1	e-109	99
279	490	N	1		233	21	+		e-108	99
46	700	N	3	703	46	703	-	Sf9LR850011-5-1-C531	0	99
47	528	N	9	491	17	491	-	Sf9LR750002-5-1-C760	0	97
47	380	N	1	489	473	141	+	Sf9LR550001-5-1-C291	e-178	99
402	528	N	1	128	128	1	+		3e-60	99
47	190	N	1	161	17	161	-	Sf9LR465239-5-1	1e-65	97
50	305	N	0	410	20	275	-	Sf9LR492669-5-1	e-141	100	276..410; Spodoptera litura mago nashi mRNA, complete cds (EF635221)
51	1022	N	2	986	970	1	+	Sf9LR108422-5-1-C2	0	99
52	1015	N	0	985	22	985	-	Sf9LR53164-5-1-C1	0	99
54	306	N	1	295	24	277	-	Sf9LR450003-5-1-C20	e-136	99
55	532	N	11	507	25	507	-	Sf9LR775923-5-1	0	97
77	648	N	10	600	599	22	+	Sf9LR550001-5-1-C8	0	96
95	198	N	3	121	17	121	-	Sf9LR772779-5-1	4e-38	96
96	1668	N	1	1592	1592	19	+	Sf9LR850011-5-1-C43	0	99
102	547	N	3	462	462	18	+	Sf9LR550001-5-1-C780	0	98
147	400	N	0	268	268	15	+	Sf9LR535271-5-1	e-124	97
166	585	N	9	441	14	434	-	Sf9LR850011-5-1-C222	0	96
166	653	N	7	516	489	1	+	Sf9LR650001-5-1-C486	0	97
166	769	N	2	683	625	22	+	Sf9LR250003-5-1-C375	0	99
166	1639	N	4	1632	14	1485	-	Sf9LR350002-5-1-C1212	0	99
183	1941	N-P	0		1394	1622	-		8e-61	98
166	545	N	1	485	14	392	-	Sf9LR483423-5-1	0	99
574	639	N	0		404	469	-		5e-28	100
170	326	N	3	175	16	175	-	Sf9LR745567-5-1	6e-68	96
172	235	N	0	79	16	79	-	Sf9LR708818-5-1	2e-24	98
173	560	N	2	491	475	90	+	Sf9LR495862-5-1	0	99	1..90; Spodoptera frugiperda scavenger receptor SR-C-like protein mRNA, complete cds.(DQ289583)
173	506	N	4	357	22	357	-	Sf9LR350002-5-1-C826	e-161	97
173	215	N	1	63	22	63	-	Sf9LR901216-5-1	7e-09	97
174	429	N	0	563	189	444	-	Sf9LR842917-5-1	e-141	100	1..189; 445..563; Manduca sexta ribosomal protein S17 (rps17) mRNA, complete cds. (GU084287)
174	543	N	1	546	530	162	+	Sf9LR18804-5-1-C1	0	99	1..161; Spodoptera frugiperda ribosomal protein S14 mRNA, complete cds.(AF400211)
174	1695	N	0	1559	1537	16	+	Sf9LR750002-5-1-C871	0	99
174	452	N	1	963	422	143	+	Sf9LR850011-5-1-C373	e-148	99	423..963; Bombyx mori mRNA, clone: fcaL39F03_K04886.(AK384816)
479	585	N	0		107	1	+		2e-52	100
175	241	N	0	89	23	89	-	Sf9LR599058-5-1	1e-28	100
175	646	N	3	499	22	496	-	Sf9LR163152-5-1	0	98
176	229	N	0	75	22	75	-	Sf9LR870031-5-1	8e-21	100
177	614	N	2	464	25	464	-	Sf9LR698788-5-1	0	99
181	574	N	2	496	23	416	-	Sf9LR466152-5-1	0	98
5	78	3' UTR	0		421	495	-		1e-28	98
182	342	N	3	187	28	187	-	Sf9LR901592-5-1	6e-71	98
182	433	N	8	286	29	286	-	Sf9LR567404-5-1	e-105	96
183	320	N	1	237	96	232	-	Sf9LR763904-5-1	4e-66	99
183	588	N	0	502	97	502	-	Sf9LR515839-5-1	0	99
183	653	N	6	506	30	500	-	Sf9LR536089-5-1	0	97
201	354	N	2	490	339	490	-	Sf9LR754993-5-1	6e-71	98	1..338; PREDICTED: Papilio machaon signal recognition particle 19 kDa protein (LOC106717439), mRNA (XM_014511303)
215	352	N	3	418	278	418	-	Sf9LR903538-5-1	1e-56	96	1..277; no significant hit
227	578	N	1	475	374	22	+	Sf9LR850271-5-1	0	99	375..475; PREDICTED: Bactrocera oleae ATP-dependent RNA helicase p62-like (LOC106617345), mRNA. (XM_014234458)
242	501	N	0	514	255	514	-	Sf9LR596840-5-1	e-144	100	1..254; Spodoptera frugiperda ribosomal protein L34 mRNA, complete cds. (KT218666)
284	390	N	0	665	559	665	-	Sf9LR850011-5-1-C285	2e-52	100	1..558; PREDICTED: Bombyx mori putative SERF-like protein (LOC101746259), mRNA. (XM_004930044)
312	770	N	11	489	489	22	+	Sf9LR750002-5-1-C876	0	97
330	1190	N	15	2140	1277	2140	-	Sf9LR650001-5-1-C1661	0	97	1..1276; Spodoptera exigua ADP-ribosylation factor mRNA, complete cds.(JF915770)
336	388	N	1	73	73	20	+	Sf9LR464144-5-1	5e-16	98
336	510	N	0	370	370	196	-	Sf9LR762259-5-1	7e-89	98	1..172; Spodoptera frugiperda elongation factor 1-alpha mRNA, complete cds. (KT218669)
393	419	N	0		173	199	-		0.0001	100
339	648	N	5	335	1	315	-	Sf9LR750002-5-1-C1163	e-154	97
379	642	N	1	503	241	503	-	Sf9LR122905-5-1	e-141	99	1..240; PREDICTED: Bombyx mori deoxyuridine 5'-triphosphate nucleotidohydrolase (LOC101741979), mRNA. (XM_004931260)
384	773	N	9	414	414	20	+	Sf9LR634127-5-1	0	97
400	537	N	2	140	140	1	+	Sf9LR482278-5-1	3e-60	97
423	563	N	2	461	323	461	-	Sf9LR850828-5-1	5e-59	97	1..322; Bombyx mori 3' end of type I intron flanking 28S rDNA. (X01051)
474	559	N	1	111	111	25	+	Sf9LR703230-5-1	1e-35	98
481	633	N	1	272	105	256	-	Sf9LR591820-5-1	4e-75	99	1..104; PREDICTED: Amyelois transitella brain acid soluble protein 1-like (LOC106129168), transcript variant X2, mRNA (XM_013327658)
484	537	N	1	55	55	1	+	Sf9LR466778-5-1	1e-16	98
503	596	N	2	496	403	496	-	Sf9LR871409-5-1	1e-35	97	1..402; PREDICTED: Papilio xuthus uncharacterized LOC106122488 (LOC106122488), transcript variant X2, mRNA (XM_013318470)
514	551	N	0	79	68	31	+	Sf9LR866110-5-1	3e-11	100
553	610	N	1	78	78	20	+	Sf9LR445357-5-1	5e-19	98
555	772	N	4	235	235	20	+	Sf9LR850011-5-1-C25	e-100	98
574	823	N	1	516	266	516	-	Sf9LR296785-5-1	e-133	99	1..265; no significant hit
630	899	N	8	289	289	14	+	Sf9LR839621-5-1	e-112	95
637	954	N	1	415	337	21	+	Sf9LR675289-5-1	e-173	99	338..415; PREDICTED: Papilio polytes probable ATP-dependent RNA helicase DDX23 (LOC106111151), mRNA (XM_013293149)
652	1152	N	1	500	1	500	-	SF9L04208	0	99
677	870	N	0	361	168	361	-	Sf9LR640967-5-1	e-104	100
519	634	N	1		1	115	-		5e-53	99
703	923	N	1	522	220	1	+	Sf9LR697402-5-1	e-115	99	221..522; PREDICTED: Amyelois transitella G protein-coupled receptor kinase (LOC106137977), mRNA (XM_013338941)
707	925	N	1	354	26	245	-	Sf9LR791448-5-1	e-115	99
1065	1141	N	1		263	340	-		2e-30	98
779	953	N	2	752	196	20	+	Sf9LR450003-5-1-C1051	1e-84	98	197..752; PREDICTED: Amyelois transitella RING-box protein 1A (LOC106131246), mRNA (XM_013330267)
791	829	N	0	63	63	25	+	Sf9LR914367-5-1	7e-12	100
810	899	N	4	107	107	13	+	Sf9LR866516-5-1	3e-26	94
835	1138	N	3	454	124	430	-	Sf9LR731659-5-1	e-158	98	1..123; PREDICTED: Plutella xylostella probable 28S ribosomal protein S26, mitochondrial (LOC105386380), mRNA (XM_011556922)
848	899	N	1	64	64	14	+	Sf9LR705874-5-1	7e-15	98
868	1193	N	8	346	346	19	+	Sf9LR572709-5-1	e-142	96
885	1683	N	0	896	18	816	-	Sf9LR550001-5-1-C1747	0	99
928	1202	N	0	390	390	116	+	Sf9LR681742-5-1	e-152	100
1239	1284	N	0		65	20	+		5e-16	100
937	1191	N	1	368	256	1	+	Sf9LR886069-5-1	e-132	98
744	840	N			357	261	+		4e-44	98
937	1191	N	0	367	255	1	+	Sf9LR700681-5-1	e-136	99
744	840	N	0		356	260	+		4e-44	98
972	1099	N	2	501	501	376	+	Sf9LR901939-5-1	2e-55	98	1..375; no significant hit
1045	1331	N	0	501	287	1	+	Sf9LR727642-5-1	e-157	99
777	938	N	0		501	295	+		e-110	99
1045	1656	N	7	832	619	1	+	Sf9LR750002-5-1-C945	0	98
778	983	N	0		832	627	+			100
1264	1695	N	1	444	1	433	-	Sf9LR531716-5-1	0	98
1267	1554	N	0	467	20	307	-	Sf9LR669503-5-1	e-158	99
1305	1455	N	0	499	499	349	+	Sf9LR850011-5-1-C687	1e-78	100	1..348; Spodoptera frugiperda haplotype CS7 cytochrome oxidase subunit I (COI) gene, partial cds; mitochondrial (HM136592)
1313	1713	N	0	401	1	401	-	SF9L08948	0	100
1332	1547	N	0	437	235	20	+	Sf9LR746237-5-1	e-115	99
1133	1307	N	2		422	250	+		4e-84	98
1375	1576	N	1	467	267	467	-	Sf9LR902721-5-1	e-104	99
1130	1348	N	5		1	222	-		2e-98	97
1505	2314	N	5	835	835	25	+	Sf9LR165185-5-1-C1	0	99
1539	1599	N	0	614	537	597	-	Sf9LR850585-5-1-C1	5e-25	100	1..536; no significant hit
1569	1628	N	0	546	462	521	-	Sf9LR703920-5-1-C1	2e-24	100	1..461; PREDICTED: Plutella xylostella outer dense fiber protein 3-like (LOC105380146), mRNA (XM_011549648)
1717	1887	P	2	312	195	23	+	Sf9LR607688-5-1	3e-82	98
1725	2417	P	1	797	102	793	-	Sf9LR565389-5-1-C1	0	99
1725	1938	P	0	371	236	23	+	Sf9LR749708-5-1	e-116	100
1728	2129	P	6	417	12	417	-	Sf9LR375780-5-1-C1	0	98
1730	2321	P	0	760	612	21	+	Sf9LR862464-5-1-C1	0	99
1735	1914	P	0	356	203	24	+	Sf9LR457340-5-1-C1	5e-96	100
1738	2485	P	1	1568	771	23	+	Sf9LR650001-5-1-C504	0	99	772..1568; Spodoptera frugiperda mitochondrion (KM362176 )
1770	2344	P	1	584	576	1	+	Sf9LR757142-5-1-C1	0	99
1805	1958	P	2	180	25	180	-	Sf9LR866841-5-1	4e-75	98
1875	1932	P	1	382	82	24	+	Sf9LR454519-5-1-C3	5e-19	98	83..382; PREDICTED: Papilio machaon unc-112-related protein-like (LOC106721672), transcript variant X1, mRNA (XM_014516691)
1876	1793	P	3	499	499	401	+	Sf9LR466742-5-1-C1	9e-27	94	1..400; Bombyx mori strain p50T type IV collagen (Let-2) gene, complete cds (EU183410)
2273	2707	P	3	827	396	827	-	Sf9LR858419-5-1-C1	0	99	1..395; PREDICTED: Papilio polytes transmembrane protein 256-like (LOC106111060), mRNA (XM_013293026)
2338	3323	P-M	7	1002	983	1	+	Sf9LR750002-5-1-C1398	0	99
6114	6139	G-X IGR	0		323	298	+		0.099	99
2375	3031	P	8	666	666	12	+	Sf9LR563383-5-1-C1	0	98
6014	6139	G-X IGR	1		47	21	+		6.1	96
2387	2918	P	1	537	537	7	+	Sf9LR650001-5-1-C1153	0	99
2424	2588	P	4	192	24	192	-	Sf9LR560164-5-1-C1	2e-70	97
2425	3249	P-M	2	848	1	825	-	Sf9LR451972-5-1-C2	0	99
6114	6139	G-X IGR	0		573	598	-		0.0004	99
2538	3006	P	6	473	1	463	-	Sf9LR895413-5-1-C1	0	98
2826	2866	P	0	64	20	60	-	Sf9LR895870-5-1	5e-13	100
2884	3000	P-M IGR	0	141	21	137	-	Sf9LR441881-5-1-C1	5e-56	99
3012	3477	M	3	746	282	746	-	Sf9LR650884-5-1-C3	0	99
3013	3869	M	1	906	29	886	-	Sf9LR852743-5-1-C1	0	99
3045	3881	M	0	871	16	852	-	Sf9LR750002-5-1-C1154	0	99
3067	3647	M	7	596	17	596	-	Sf9LR552493-5-1-C1	0	98
3198	3893	M	1	735	25	719	-	Sf9LR451972-5-1-C1	0	99
3246	3828	M	0	623	20	602	-	Sf9LR162258-5-1-C1	0	99
3249	3904	M	0	738	722	65	+	Sf9LR650884-5-1-C2	0	99
3250	3880	M	0	672	651	20	+	Sf9LR552493-5-1-C2	0	99
3250	3832	M	0	620	599	17	+	Sf9LR50938-5-1-C1	0	99
3253	3703	M	4	470	18	468	-	Sf9LR667652-5-1	0	98
3257	3461	M	5	227	18	227	-	Sf9LR905486-5-1	3e-88	96
3257	3438	M	6	212	25	212	-	Sf9LR650884-5-1-C1	4e-75	96
3306	3845	M	2	557	557	16	+	Sf9LR106224-5-1-C1	0	99
3481	3906	M	2	503	503	78	+	Sf9LR408294-5-1-C1	0	99
3560	3603	M	0	73	30	73	-	Sf9LR655950-5-1	7e-15	100
3970	4623	M-G	0	1068	1046	393	+	Sf9LR650705-5-1-C1	0	100	1..392; PREDICTED: Papilio polytes threonylcarbamoyladenosine tRNA methylthiotransferase (LOC106101734), mRNA (XM_013281055)
3970	3997	M	0	213	22	49	-	Sf9LR561212-5-1-C1	3e-05	100
3977	4259	M-G	2	314	300	20	+	Sf9LR487363-5-1	e-136	97
3977	4259	M-G	4	306	298	20	+	Sf9LR601496-5-1	e-126	96
4023	4056	M-G IGR	0	98	36	69	-	Sf9LR571595-5-1-C1	7e-09	100
4023	4050	M-G IGR	0	63	36	63	-	Sf9LR494825-5-1	3e-05	100
4023	4048	M-G IGR	0	71	36	61	-	Sf9LR660864-5-1-C1	0.0004	100
4132	5175	G	4	1086	1063	22	+	Sf9LR861504-5-1-C1	0	99
4160	6027	G	5	2014	148	2014	-	Sf9LR751204-5-1-C2	0	99
4161	6133	G	3	2001	12	1985	-	Sf9LR550001-5-1-C373	0	99
2997	3016	P-M IGR	0		1966	1985	-		1.5	100
4168	4725	G	4	601	584	23	+	Sf9LR439321-5-1-C1	0	98
4169	6766	G	4	2629	18	2617	-	Sf9LR450353-5-1-C1	0	99
2997	3022	P-M IGR	0		1962	1987	-		0.0004	100
4265	4624	G	5	464	86	450	-	Sf9LR814057-5-1	0	98
4588	4626	G	2	61	61	21	+	Sf9LR661050-5-1	0.0004	92
4621	4733	G	1	514	403	514	-	Sf9LR515437-5-1	7e-49	98	1..402; PREDICTED: Papilio polytes superkiller viralicidic activity 2-like 2 (LOC106099312), mRNA (XM_013277824)
4650	5296	G	10	1269	1	1269	-	Sf9LR650001-5-1-C1324	0	98
4767	5236	G	3	667	490	20	+	Sf9LR127403-5-1-C1	0	99
8472	8523	L	0		544	493	+		2e-15	96
4767	5378	G	9	645	619	1	+	Sf9LR850048-5-1-C3	0	97
8500	8523	L	0		645	622	+		0.006	100
4988	5043	G	1	76	76	20	+	Sf9LR780919-5-1	2e-15	96
5058	6135	G	5	1102	1102	22	+	Sf9LR850048-5-1-C1	0	98
2997	3018	P-M IGR	0		43	22	+		0.099	100
5123	5190	G	0	123	100	33	+	Sf9LR560937-5-1-C1	3e-29	100
5128	5189	G	0	82	21	82	-	Sf9LR650001-5-1-C304	1e-25	100
5174	6967	G-X	11	1819	1805	1	+	Sf9LR270178-5-1-C1	0	98
5177	5919	G	2	747	5	747	-	Sf9LR192893-5-1-C1	0	99
5177	5760	G	15	612	20	612	-	Sf9LR850048-5-1-C4	0	97
5222	5433	G	0	340	124	335	-	Sf9LR612925-5-1	e-115	100	1..123; PREDICTED: Papilio xuthus uncharacterized LOC106124291 (LOC106124291), transcript variant X2, mRNA (XM_013320788)
5231	6014	G	0	833	813	30	+	Sf9LR25718-5-1-C1	0	99
5237	6054	G	0	864	26	832	-	Sf9LR367374-5-1-C1	0	100
5306	5696	G	1	409	17	408	-	Sf9LR650001-5-1-C467	0	98
5444	6014	G	0	620	21	591	-	Sf9LR109180-5-1-C1	0	99
5488	6329	G-X	0	884	864	23	+	Sf9LR650001-5-1-C1626	0	100
2997	3022		0		238	213	+		0.0004	100
5510	6133	G	1	858	845	221	+	Sf9LR751204-5-1-C1	0	99
6148	6329	G-X	0		204	23	+		3e-97	100
5534	6035	G	3	526	19	523	-	Sf9LR450353-5-1-C2	0	97
5593	6078	G-X IGR	1	504	20	504	-	Sf9LR52778-5-1-C1	0	99
5650	6053	G	8	434	434	23	+	Sf9LR850048-5-1-C2	0	97
5672	5789	G	0	395	395	278	+	Sf9LR512583-5-1	5e-59	100	1..277; no significant hit
5703	6004	G	4	317	317	18	+	Sf9LR892053-5-1	e-146	98
5886	5931	G	1	48	1	45	-	Sf9LR456095-5-1	3e-11	97
5935	6054	G	0	142	142	23	+	Sf9LR452909-5-1	3e-60	100
5959	6279	G-X	0	499	321	1	+	Sf9LR699432-5-1	e-180	100	322..499; Spodoptera exigua translation elongation factor 2 mRNA, complete cds (AY078407)
2997	3022	P-M IGR	0		166	141	+		0.0004	100
6142	6329	X	0	337	210	23	+	Sf9LR566974-5-1-C1	e-101	100
6142	6329	X	1	351	211	23	+	Sf9LR695800-5-1	1e-96	99
6153	6556	X	0	439	21	424	-	Sf9LR197909-5-1-C1	0	99
6158	6556	X	3	436	27	422	-	Sf9LR352743-5-1-C1	0	98
6736	6776	X-L IGR	1	531	508	467	+	Sf9LR562510-5-1-C1	7e-09	97	1..466; no significant hit
6737	6868	L	3	452	310	444	-	Sf9LR650001-5-1-C507	8e-58	97	1..309; Spodoptera frugiperda ribosomal protein L37A mRNA, complete cds (AF400200)
6927	7685	L	1	778	3	760	-	Sf9LR651676-5-1-C1	0	99
6966	7469	L	7	511	1	511	-	Sf9LR857736-5-1-C1	0	98
7095	7685	L	2	633	23	615	-	Sf9LR579910-5-1-C1	0	99
7197	7619	L	6	425	1	425	-	Sf9LR805498-5-1-C1	0	97
8052	8582	L	5	534	534	1	+	Sf9LR353424-5-1-C1	0	98
8360	8746	L	2	423	18	406	-	Sf9LR751534-5-1-C1	0	99
8483	9160	L	3	701	21	701	-	Sf9LR579700-5-1-C1	0	99
9806	10278	L	1	489	16	489	-	Sf9LR465894-5-1-C1	0	99
10035	10217	L	2	209	22	206	-	Sf9LR756201-5-1-C1	2e-89	98
10165	10696	L	8	550	1	536	-	Sf9LR760510-5-1-C1	0	99
10273	10760	L	4	513	20	507	-	Sf9LR161041-5-1-C3	0	99
10286	10637	L	2	1401	17	366	-	Sf9LR451512-5-1-C1	0	99	367..1401; 83A24_SfBAC_fin, Spodoptera frugiperda BAC, egg DNA (FP340418)
10361	11551	L	2	1441	16	1204	-	Sf9LR650001-5-1-C1230	0	99	1205..1441; PREDICTED: Papilio polytes protein DEK-like (LOC106111887), transcript variant X2, mRNA (XM_013294077)
10369	11347	L	4	1017	19	999	-	Sf9LR470914-5-1-C1	0	99
10547	11231	L	3	701	20	701	-	Sf9LR563952-5-1-C1	0	99
10601	10874	L	5	290	22	290	-	Sf9LR711496-5-1	e-129	97
10704	11669	L	2	985	1	966	-	Sf9LR769116-5-1-C1	0	99
11082	11512	L	1	430	1	430	-	Sf9LR864827-5-1-C1	0	99
11310	11352	L	0	63	63	21	+	Sf9LR914623-5-1	3e-14	100
11341	11669	L	0	357	348	20	+	Sf9LR678640-5-1	0	100
11436	11551	L	0	613	11	126	-	Sf9LR550001-5-1-C1015	2e-55	99	127..613; PREDICTED: Bombyx mori protein DEK-like (LOC101736883), transcript variant X2, mRNA (XM_004925261)
11846	12470	L	9	617	616	1	+	Sf9LR698549-5-1-C1	0	98
11846	12353	L	2	520	511	2	+	Sf9LR617622-5-1-C1	0	99
12010	12306	L	1	438	296	1	+	Sf9LR319996-5-1	e-161	99	297..438; Spodoptera frugiperda DnaJ mRNA, complete cds (KF562156)
12176	12853	L	3	677	1	677	-	Sf9LR657430-5-1-C1	0	99
12373	12845	L	1	474	1	474	-	Sf9LR770000-5-1-C1	0	99
12659	12763	L	0	650	606	502	+	Sf9LR261653-5-1-C1	3e-51	100	1..501; PREDICTED: Papilio polytes apoptosis inhibitor 5 (LOC106100738), mRNA (XM_013279748)
12849	13473	L	0	678	653	29	+	Sf9LR783743-5-1-C1	0	99
12954	13445	L	4	512	23	512	-	Sf9LR468077-5-1-C1	0	98
13029	13387	L	4	869	1	361	-	Sf9LR54192-5-1-C1	e-179	98	362..869; Spodoptera frugiperda sequence from BAC clone 75E05 (FO681368)
13411	13505	5' UTR	0	529	496	402	+	Sf9LR276052-5-1-C2	3e-45	100	1..401; no significant hit
*: UTR, untranslated region; IGR, intergenic retion.
**: + represents complementary sequence to SfRV RNA (-).
***: Hit EST clone sequence consisting SfRV and Sf genome sequence, blastN search was performed to identify Sf sequence.
